# Supplementary material for: Depression in glass transition temperature of multiwalled carbon nanotubes reinforced polycarbonate composites: effect of functionalization
Source: Royal Society of Chemistry journal article supplement (doi:10.1039/c5ra05825b), 2015-01-01
Supplement: c5ra05825b1.pdf [file c5ra05825b1.pdf]

## Supplementary Information

### Depression in glass transition temperature of multiwalled carbon nanotubes reinforced polycarbonate composites: Effect of functionalization

Arun Singh Babal<sup>1</sup>, Ravi Gupta<sup>1</sup>, Bhanu Pratap Singh<sup>1\*</sup>, Sanjay R. Dhakate<sup>1</sup>

Physics and Engineering of Carbon, CSIR-National Physical Laboratory, New Delhi, India-110012

**Table S1: Storage modulus parameters of PC composite material**

| S.No. | System             | Storage Modulus E' (MPa) |       |
|-------|--------------------|--------------------------|-------|
|       |                    | 40°C                     | 180°C |
| 1     | Pure PC            | 1050                     | 3     |
| 2     | 0.5 wt. % MWCNT/PC | 1152                     | 7     |
| 3     | 1 wt. % MWCNT/PC   | 1254                     | 9     |
| 4     | 2 wt. % MWCNT/PC   | 1378                     | 13    |
| 5     | 2 wt. % a-MWCNT/PC | 1652                     | 15    |
| 6     | 5 wt. % MWCNT/PC   | 1630                     | 28    |
| 7     | 10 wt. % MWCNT/PC  | 1910                     | 51    |

**Table S2: Glass Transition Temperature parameters of composite material**

| S.No. | System             | Glass Transition Temperature (°C) |           |
|-------|--------------------|-----------------------------------|-----------|
|       |                    | Storage Modulus                   | Tan Delta |
| 1     | Pure PC            | 145.30                            | 160.20    |
| 2     | 0.5 wt. % MWCNT/PC | 145.00                            | 159.40    |
| 3     | 1 wt. % MWCNT/PC   | 144.50                            | 159.00    |
| 4     | 2 wt. % MWCNT/PC   | 144.00                            | 158.50    |
| 5     | 2 wt. % a-MWCNT/PC | 143.70                            | 158.10    |
| 6     | 5 wt. % MWCNT/PC   | 143.26                            | 157.50    |
| 7     | 10 wt. % MWCNT/PC  | 141.90                            | 157.00    |

**Table S3: XRD peaks of as produced MWCNTs and acid modified MWCNTs**

|                                   |        |        |        |         |                 |
|-----------------------------------|--------|--------|--------|---------|-----------------|
| As produced MWCNT (2 $\theta$ )   | 26     | 41.5   | 42.8   | 44.4    | 78 (minor hump) |
| Plane                             | C(002) | C(100) | C(101) | Fe(011) | C(110)          |
| Acid modified MWCNT (2 $\theta$ ) | 26     | 42.8   | 43.6   | 44.7    | 78 (minor hump) |
| Plane                             | C(002) | C(100) | C(101) | Fe(011) | C(110)          |
